# Supplementary material for: Designing different morphologies of NiFe2O4 for tuning of structural, optical and magnetic properties for catalytic advancements
Source: Royal Society of Chemistry journal article supplement (doi:10.1039/c6nj03209e), 2016-01-01
Supplement: c6nj03209e1.pdf [file c6nj03209e1.pdf]

**Designing different morphologies of NiFe<sub>2</sub>O<sub>4</sub> for tuning of structural, optical and magnetic properties for catalytic advancements**

**Manisha Dhiman<sup>a</sup>, Ankita Goyal<sup>a</sup>, Vinod Kumar<sup>b</sup>, Sonal Singhal<sup>a\*</sup>**

<sup>a</sup>Department of Chemistry, Panjab University, Chandigarh, India-160014.

<sup>b</sup>Icon Analytical Equipment (P) Ltd., Mumbai, 400018, India

\*[sonal1174@gmail.com](mailto:sonal1174@gmail.com); [sonal@pu.ac.in](mailto:sonal@pu.ac.in)

**CORRESPONDING AUTHOR:** Sonal Singhal  
Associate Professor,  
Department of Chemistry,  
Panjab University,  
Chandigarh, India - 160 014  
Ph. No. +91-172-2534421(o)  
+91-09872118810(m)  
Fax No. +91-172-2545074  
**E-mail:** [sonal1174@gmail.com](mailto:sonal1174@gmail.com)

Supplementary material

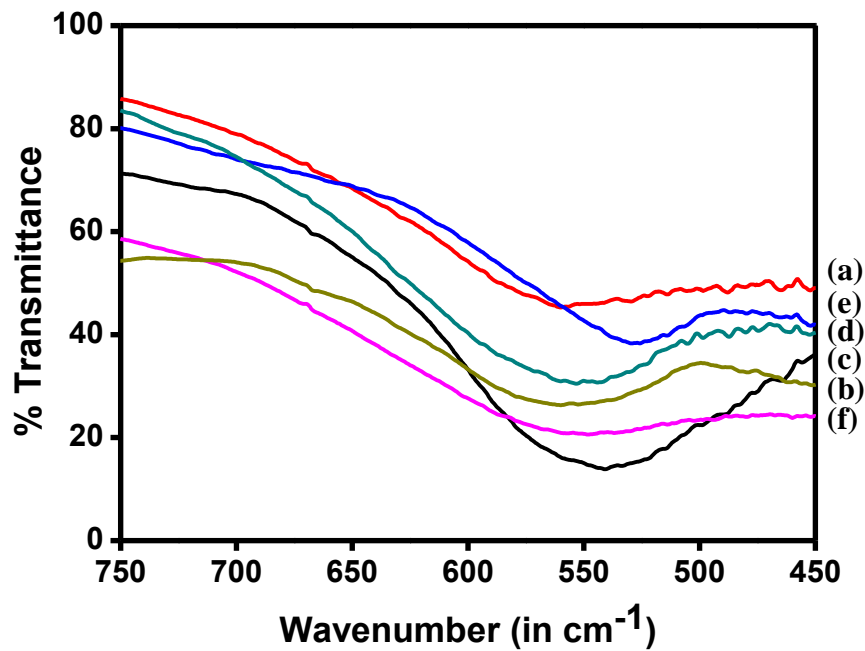

Fig. S1. Typical FT-IR spectra of NiFe<sub>2</sub>O<sub>4</sub> nanostructures (a) NiFe-1 (b) NiFe-2 (c) NiFe-3 (d) NiFe-4 (e) NiFe-5 and (f) NiFe-6.

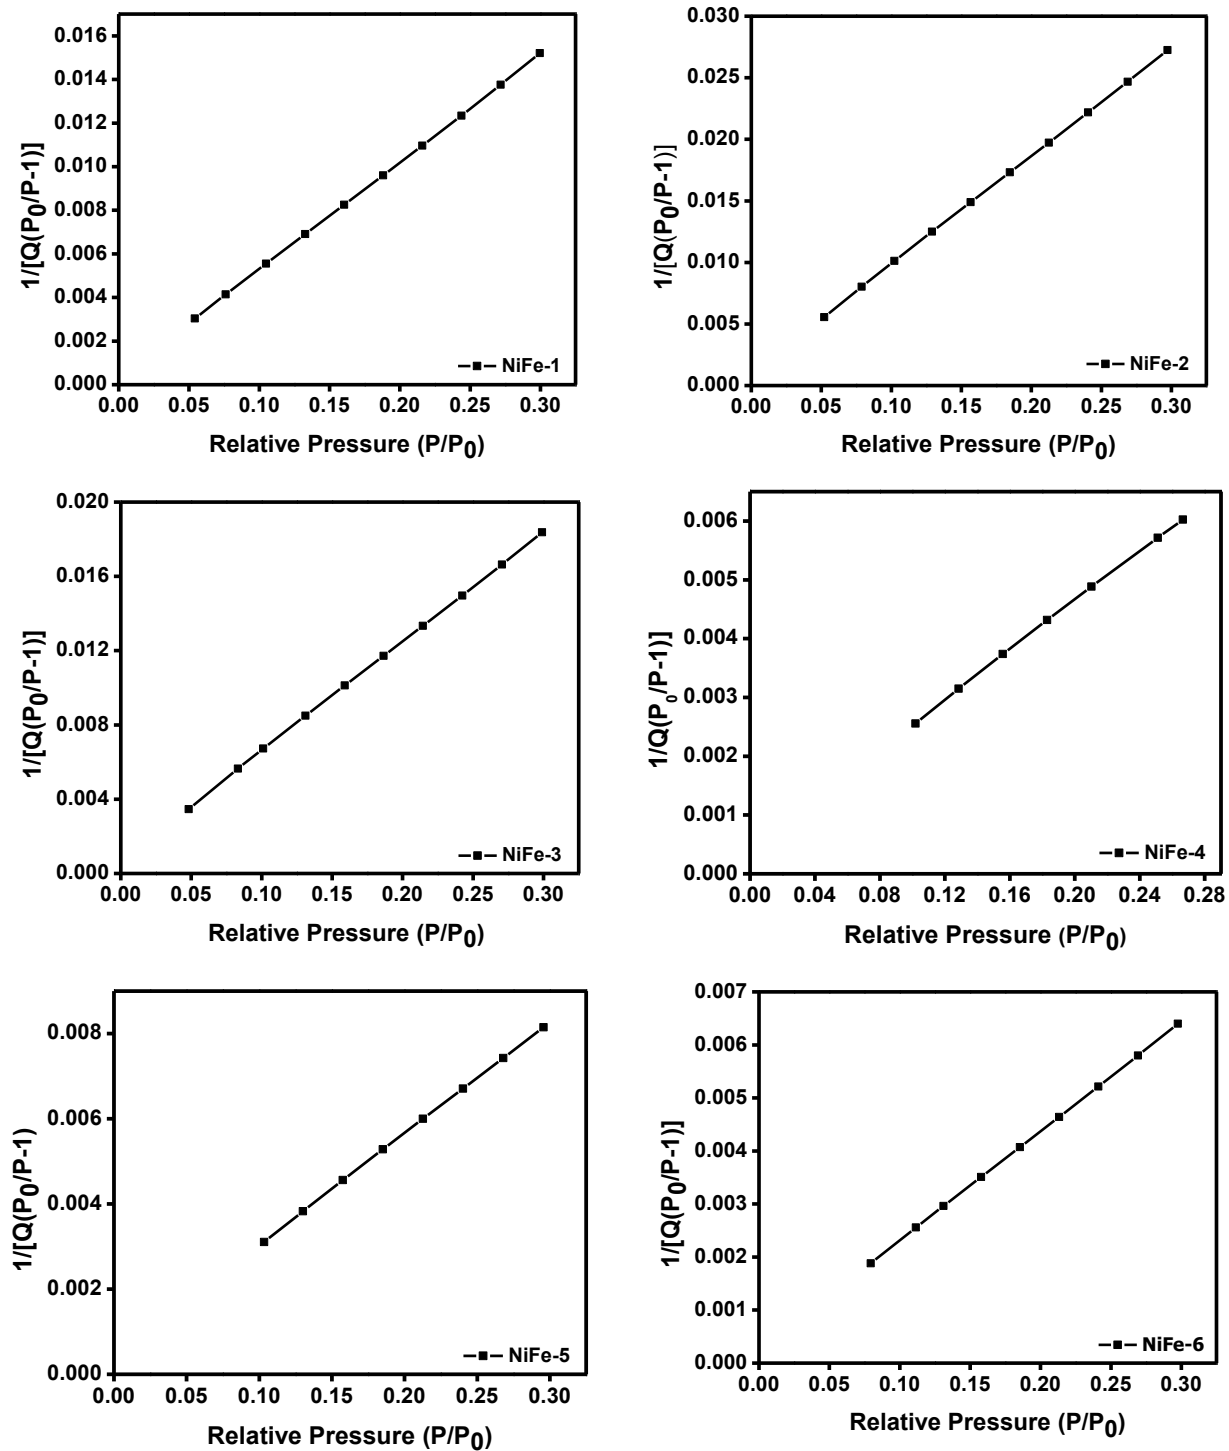

Fig. S2. The fitting curves of the BET surface area of NiFe<sub>2</sub>O<sub>4</sub> nanostructures

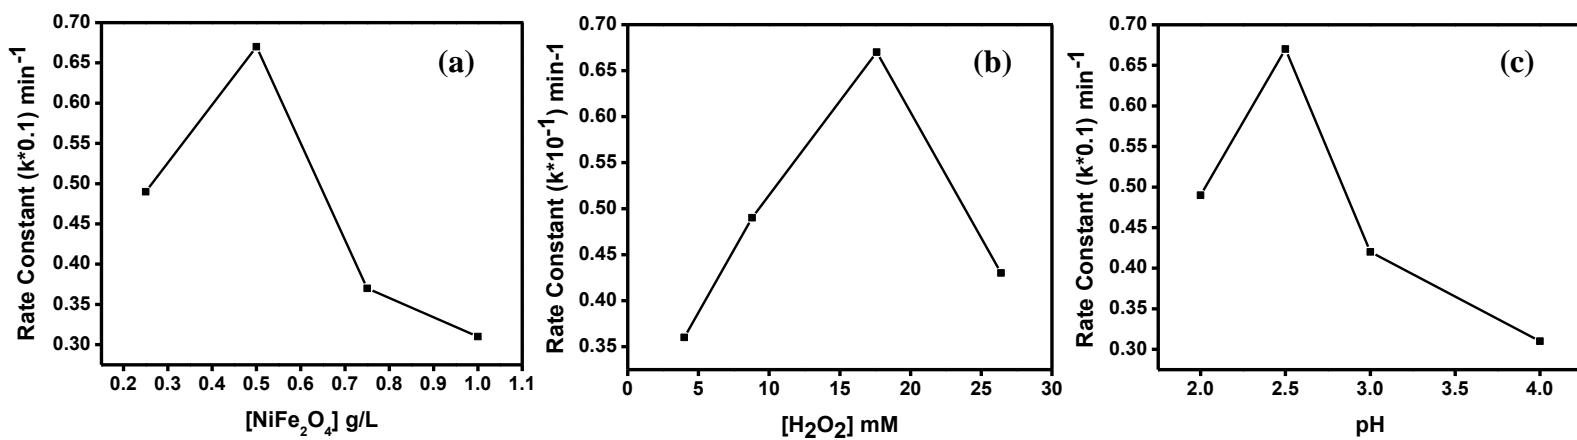

**Fig. S3.** Change in SO degradation rate with variation in (a) catalyst loading (b) H<sub>2</sub>O<sub>2</sub> concentration (c) pH using NiFe<sub>2</sub>O<sub>4</sub> nanoparticles as catalyst.
